# Supplementary material
Source: PubMed Central journal article supplement (PMC3910269)
Supplement: NIHMS535213-supplement-supplement_1.pdf [file NIHMS535213-supplement-supplement_1.pdf]

**Supplemental Table 1:** Assessment of Study Quality using QUADAS

| Study           | QUADAS | Study                 | QUADAS |
|-----------------|--------|-----------------------|--------|
|                 | Score  |                       | Score  |
| Canto et al.    | 14     | Niepsul et al.        | 14     |
| Grossner et al. | 12     | Camus et al.          | 14     |
| Horwhat et al.  | 14     | Curvers et al. (2008) | 11     |
| Kara et al.     | 14     | Curvers et al. (2010) | 13.5   |
| Ragunath et al. | 13     | Curvers et al. (2011) | 13.5   |
| Fortun et al.   | 13     | Woflsen et al.        | 12     |
| Wo et al.       | 13     | Sharma et al.         | 14     |

All studies were assessed by two reviewers and the two scores were averaged utilizing the Quality Assessment of Diagnostic Accuracy Studies (QUADAS) Tool as adapted from Whiting P et al. *BMC Med Res Methodol* 2003; 3:

**Supplemental Table 2:** sensitivity analysis to detect changes in estimated risk difference based on varying external correlation.

| <b>External Correlation</b> | <b>Estimated RD</b> | <b>95% CI</b> | <b>P-value</b> |
|-----------------------------|---------------------|---------------|----------------|
| 0.3                         | 0.33                | [0.19 – 0.47] | <0.0001        |
| 0.5                         | 0.34                | [0.20 – 0.48] | <0.0001        |
| 0.7                         | 0.35                | [0.21 – 0.49] | <0.0001        |
| 0.99                        | 0.35                | [0.25 – 0.45] | <0.0001        |

RD: risk difference; CI: confidence interval
